# Supplementary material
Source: publisher figshare collection journal article supplement (https://gsajournals.figshare.com/ndownloader/files/39530629)
Supplement: Supplementary file 1 [file 39530629]

## Sheet: Sheet1
Isolate	Sequencing Location	Number of Reads from Sequencer	Number of Reads (trimmed)	Number of Reads (remove duplicates)	Number of reads mapped to PTT	Percent reads mapped to PTT	Insert Size	Coverage Average (merged)	Bases Covered	Percent Genome with Coverage
1	Novogene	11016594	9714023	8159538	5423266	46.3	137.99	15.8761	40268657	86.5768
2	Novogene	10248326	8939471	7606748	5731161	52.3	145.44	14.5752	41020669	88.1936
3	Novogene	11975140	10192495	8614681	6549625	53.5	139.99	15.8827	41256464	88.7006
5	Novogene	6094552	5168588	4340904	3046805	48.3	140.6	8.96937	38202849	82.1354
6	Novogene	8277646	7044786	5855538	4238376	53.1	142.05	11.3091	39325387	84.5488
7	Novogene	10134326	8667340	7339350	5921759	56.5	146.66	14.1686	40200861	86.431
8	Novogene	6663912	5917293	5051312	3961163	55.2	118.65	10.4243	39167288	84.2089
9	Novogene	7443942	6449350	5509314	4099857	51.4	140.54	11.401	38388021	82.5335
10	Novogene	10842676	9367883	7892796	6102873	55.1	151.97	14.6489	41023228	88.1991
11	Novogene	9433532	8315213	7028482	5172410	51.3	135.45	13.8085	40186772	86.4007
12	Novogene	8851758	7531677	6877052	5570881	55.9	131.59	13.0214	40366216	86.7865
13	Novogene	10962258	9374772	7996513	6658927	60.6	158.73	14.1077	43159719	92.7925
14	Novogene	9557518	8060342	7331621	5414476	51.9	142.88	13.3071	40317873	86.6826
15	Novogene	13555256	11377434	9611848	7569203	54.5	157.38	18.1775	41640585	89.5264
16	Novogene	10231892	8897804	7560876	5766811	52.6	136.56	14.8131	39833824	85.6419
17	Novogene	16173310	11983756	11691023	9230509	56.4	192.74	20.9469	42400486	91.1602
18	Novogene	10385214	7882634	7729650	5697505	51.2	161.3	15.0467	39755108	85.4727
19	Novogene	12600998	9645012	9404096	7452575	55.6	151.97	17.5324	41130229	88.4292
20	Novogene	9697822	7316099	7163850	5519974	55.2	160.99	13.3595	41495290	89.214
21	Novogene	8750580	6634255	6499397	4378468	48.9	143.24	12.0777	40395495	86.8495
22	Novogene	5167796	3733004	3657835	2661227	50.9	151.31	7.32097	37083477	79.7287
23	Novogene	15290798	10954119	10706326	7468902	48.2	214.62	20.6553	39359576	84.6223
25	Novogene	12416230	9545612	9365099	4909852	44.4	170.58	14.8613	39959993	85.9132
27	Novogene	8334238	6165748	6027012	4385169	49.9	147.65	12.0815	39764502	85.4929
28	Novogene	6601516	4885951	4760642	1689546	52.2	150.41	4.9695	23958227	51.5097
29	Novogene	12348100	10203453	8655216	6789708	54.3	159.23	16.6086	40419106	86.9003
30	Novogene	8214434	5920254	5804313	4342674	51.5	169.58	12.0958	40243021	86.5217
31	Novogene	8908812	6578173	6427743	4790463	51.9	166	12.4387	39141190	84.1528
32	Novogene	10971832	8170313	8010894	6456398	57.3	172.26	14.7791	41441316	89.098
33	Novogene	8514026	6226288	6084470	3830513	57.9	161.27	9.00514	40026233	86.0556
34	Novogene	8050016	6129149	6022241	4569584	53.5	164.03	11.7089	40933464	88.0061
36	Novogene	11972000	10408545	8757667	6352194	50.1	147.9	17.7209	38647624	83.0916
37	Novogene	14366990	11888361	10111798	7907085	54.7	158.61	18.7231	41128273	88.425
38	Novogene	5301900	3773350	3712604	2846872	52.9	166.82	7.58948	38343623	82.438
39	Novogene	4181266	2958963	2902509	2081167	48.5	149.02	6.73162	34671003	74.542
40	Novogene	10273140	7864044	7687802	5936229	55.4	152.02	14.1665	40708836	87.5232
41	Novogene	9110920	6435085	6295467	5157025	57.3	157.11	12.3963	41501540	89.2275
42	Novogene	10456986	9197606	7689769	2250392	54.7	132.05	5.98897	32356457	69.5657
43	Novogene	14695846	10604071	10389989	8242820	55.3	167.43	20.0159	41262409	88.7133
45	Novogene	5299568	3698685	3624901	2702298	52.2	165.57	7.25815	37612695	80.8665
46	Novogene	13680942	9777284	9554205	7374512	54.2	169.15	17.5532	42186968	90.7011
47	Novogene	8210322	5965329	5844965	5024629	60.8	150.12	11.3768	41400358	89.0099
48	Novogene	8820432	7608530	6359603	2385825	48.7	133.6	7.36945	32661366	70.2213
49	Novogene	8307990	7130989	5980950	4699696	54.9	139.2	11.7257	41438315	89.0915
50	Novogene	8484590	7105288	5971017	4634397	54.8	151.94	11.3243	39121199	84.1098
51	Novogene	8988350	6276689	6147316	4322451	48.1	172.99	12.2574	39155786	84.1841
52	Novogene	7656044	5365137	5257362	3679875	47	164.75	10.8991	37677623	81.0061
53	Novogene	11496848	9464994	7935824	6420346	57.4	174.91	14.5735	40540128	87.1605
55	Novogene	7635316	5767118	5641490	3993891	48.4	137.84	11.2412	38740823	83.292
56	Novogene	12170694	10292276	8661131	6491330	52.9	151.46	15.4413	40957463	88.0577
57	Novogene	4669136	3345104	3277263	2475954	51.6	137.47	7.18717	34886829	75.006
58	Novogene	9657442	6968782	6823679	5641807	57.3	167.57	13.6744	41118114	88.4031
59	Novogene	15393352	11347428	11078490	9022844	58	167.15	19.9975	40938201	88.0163
60	Novogene	5682758	4086104	4005228	2905329	50.2	160.46	8.13606	38122791	81.9632
61	Novogene	10969884	8450186	8284144	6676656	57.4	150.77	15.2739	43201957	92.8833
62	Novogene	10294472	7908041	7717891	6472511	59.6	141.5	14.4259	41331547	88.862
63	Novogene	3687586	2557846	2502537	1832612	49.6	149.56	5.76462	30850615	66.3282
64	Novogene	11913844	9055726	8782519	6472259	53.3	146.45	15.9464	41124086	88.416
65	Novogene	6404188	4608238	4523514	3544260	55.2	185.65	8.74414	40971749	88.0884
66	Novogene	9104860	6795377	6642785	4933818	51.6	156.77	13.1145	40279710	86.6006
67	Novogene	6901930	5231620	5106598	3923940	53.5	137.19	10.5265	40437993	86.9409
68	Novogene	7410524	5457712	5310399	3779742	47.7	135.13	12.0451	37202948	79.9856
69	Novogene	9595534	7522335	7174608	3814810	58.4	143.88	9.14866	39399495	84.7081
70	Novogene	11141322	8411373	8221704	6225642	53.7	152.52	15.37	40685509	87.473
72	Novogene	13163016	10116256	9897455	7039555	49.6	161.81	18.7562	40098377	86.2107
75	Novogene	7410530	5257884	5124765	3766910	50.8	133.09	10.6788	39363791	84.6314
76	Novogene	6255880	4503102	4388115	3479583	55.2	131.62	8.87357	39003430	83.8566
77	Novogene	7964892	5564727	5467208	4085640	52.1	158.76	10.6026	41317503	88.8318
79b	Novogene	8624868	7394043	6289312	5125047	57.1	144.27	12.1425	41229798	88.6432
81	Novogene	4971250	3604935	3521306	2881080	57.1	136.44	7.27078	36839621	79.2044
82	Novogene	3253074	2246572	2188535	1864177	60.5	129.33	4.54821	25665396	55.1801
83	Novogene	8560860	6237369	6058614	4938854	57.4	140.94	11.7339	41547486	89.3263
84	Novogene	6881982	4968948	4834962	3614435	50.6	135.67	10.6206	38192198	82.1125
85	Novogene	6217620	4471022	4380100	3322576	51.7	152.14	9.04262	39214477	84.3103
86	Novogene	8931060	6478848	6338117	4961622	54.3	160.29	12.825	38901850	83.6382
87	Novogene	10210828	9039474	7679826	5587461	50.6	133.88	14.8073	39973886	85.943
88	Novogene	11960490	10706111	8659826	2177744	59.3	139.23	5.53781	29766326	63.997
90	Novogene	11257842	9872188	8300450	5896650	49.4	136.86	15.9335	40512908	87.1019
91	Novogene	8033660	7095464	6065624	4479252	51.7	130.49	11.8724	39076598	84.0139
92	Novogene	7811808	6522702	5572859	4372667	55	151.26	10.7142	39994053	85.9864
93	Novogene	10651364	9305429	7837104	5587351	49.6	146.02	15.0656	40536817	87.1533
95	Novogene	10369402	9095766	7611389	5713322	53.8	148.88	14.1168	40796722	87.7121
96	Novogene	9669876	8424993	7116847	5432750	53.7	144.98	13.4306	42221972	90.7764
97	Novogene	10318350	9049886	7635093	6039473	55.6	148.57	14.4097	41812701	89.8965
98	Novogene	10248462	8938763	7421415	5756799	55.8	150.55	13.5222	42297586	90.939
100	Novogene	10727012	9331455	7790909	5539049	50.5	151.74	14.6364	41315425	88.8273
101	Novogene	10057060	8710516	7280235	5201157	52.3	150.55	13.3855	41108373	88.3822
102	Novogene	11445132	9883803	8247895	6406821	55.2	154.68	15.1977	41203615	88.5869
103	Novogene	13379414	11660577	9657028	7762177	57.5	154.37	17.6149	40989952	88.1276
104	Novogene	11680192	10118259	8456741	5519288	45.8	150.69	16.0276	40393902	86.8461
105	Novogene	10803644	9402416	7835612	5902836	53.2	148.22	14.7876	40938574	88.0171
106	Novogene	8524148	7416233	6301972	4687107	52.7	136.19	12.2781	41420478	89.0532
107	Novogene	9490330	8281442	7036712	4917964	55.3	147.17	11.9787	39979636	85.9554
108	Novogene	12878466	11184723	9479810	7656022	58.6	143.04	16.9732	42328520	91.0055
109	Novogene	7819200	6634029	5665373	4091621	50	137.96	11.2799	39971518	85.938
110	Novogene	8814574	7553969	6903132	5403058	56.6	131.52	12.2781	38941935	83.7244
111	Novogene	11563546	10091788	8566118	6099771	51.4	142.21	15.6667	40201298	86.432
112	Novogene	10904934	9388818	7899922	6035470	52.7	144.35	15.3541	39423977	84.7608
113	Novogene	9687462	8245723	7552641	5395349	55.4	127.04	12.636	39310317	84.5164
114	Novogene	10265538	8954082	7647508	5592719	51.6	140.3	14.7088	40676343	87.4533
115	Novogene	10067678	8511803	7841375	4317862	58.9	151.82	9.23964	40300005	86.6442
116	Novogene	6461530	5384723	4888463	2869163	51.8	141.21	7.54214	34435515	74.0357
117	Novogene	7076980	5841330	5320502	4453265	57.8	140.61	10.497	40791388	87.7007
118	Novogene	9980056	8305173	7552402	6105550	56.2	134.5	14.2389	40478816	87.0286
119	Novogene	7417948	6219946	5667428	2724143	53.1	135.2	7.33985	35049151	75.355
120	Novogene	10731760	9169852	8378856	6594995	55.5	144.24	14.5262	42299760	90.9436

## Sheet: Sheet2
Table S4: List hybrid progeny from the PTT x PTM crossing experiments and sequencing statistics.
Isolate	Sequencing Location	Number of Reads from Sequencer	Number of Reads (trimmed)	Number of Reads (remove duplicates)	Number of reads mapped to PTT	Percent reads mapped to PTT	Insert Size	Coverage Average (merged)	Bases Covered	Percent Genome with Coverage
1	Friesen Lab	11016594	9714023	8159538	5423266	46.3	137.99	15.8761	40268657	86.5768
2	Friesen Lab	10248326	8939471	7606748	5731161	52.3	145.44	14.5752	41020669	88.1936
3	Friesen Lab	11975140	10192495	8614681	6549625	53.5	139.99	15.8827	41256464	88.7006
5	Friesen Lab	6094552	5168588	4340904	3046805	48.3	140.6	8.96937	38202849	82.1354
6	Friesen Lab	8277646	7044786	5855538	4238376	53.1	142.05	11.3091	39325387	84.5488
7	Friesen Lab	10134326	8667340	7339350	5921759	56.5	146.66	14.1686	40200861	86.431
8	Friesen Lab	6663912	5917293	5051312	3961163	55.2	118.65	10.4243	39167288	84.2089
9	Friesen Lab	7443942	6449350	5509314	4099857	51.4	140.54	11.401	38388021	82.5335
10	Friesen Lab	10842676	9367883	7892796	6102873	55.1	151.97	14.6489	41023228	88.1991
11	Friesen Lab	9433532	8315213	7028482	5172410	51.3	135.45	13.8085	40186772	86.4007
12	Friesen Lab	8851758	7531677	6877052	5570881	55.9	131.59	13.0214	40366216	86.7865
13	Friesen Lab	10962258	9374772	7996513	6658927	60.6	158.73	14.1077	43159719	92.7925
14	Friesen Lab	9557518	8060342	7331621	5414476	51.9	142.88	13.3071	40317873	86.6826
15	Friesen Lab	13555256	11377434	9611848	7569203	54.5	157.38	18.1775	41640585	89.5264
16	Friesen Lab	10231892	8897804	7560876	5766811	52.6	136.56	14.8131	39833824	85.6419
17	Friesen Lab	16173310	11983756	11691023	9230509	56.4	192.74	20.9469	42400486	91.1602
18	Friesen Lab	10385214	7882634	7729650	5697505	51.2	161.3	15.0467	39755108	85.4727
19	Friesen Lab	12600998	9645012	9404096	7452575	55.6	151.97	17.5324	41130229	88.4292
20	Friesen Lab	9697822	7316099	7163850	5519974	55.2	160.99	13.3595	41495290	89.214
21	Friesen Lab	8750580	6634255	6499397	4378468	48.9	143.24	12.0777	40395495	86.8495
22	Friesen Lab	5167796	3733004	3657835	2661227	50.9	151.31	7.32097	37083477	79.7287
23	Friesen Lab	15290798	10954119	10706326	7468902	48.2	214.62	20.6553	39359576	84.6223
25	Friesen Lab	12416230	9545612	9365099	4909852	44.4	170.58	14.8613	39959993	85.9132
27	Friesen Lab	8334238	6165748	6027012	4385169	49.9	147.65	12.0815	39764502	85.4929
28	Friesen Lab	6601516	4885951	4760642	1689546	52.2	150.41	4.9695	23958227	51.5097
29	Friesen Lab	12348100	10203453	8655216	6789708	54.3	159.23	16.6086	40419106	86.9003
30	Friesen Lab	8214434	5920254	5804313	4342674	51.5	169.58	12.0958	40243021	86.5217
31	Friesen Lab	8908812	6578173	6427743	4790463	51.9	166	12.4387	39141190	84.1528
32	Friesen Lab	10971832	8170313	8010894	6456398	57.3	172.26	14.7791	41441316	89.098
33	Friesen Lab	8514026	6226288	6084470	3830513	57.9	161.27	9.00514	40026233	86.0556
34	Friesen Lab	8050016	6129149	6022241	4569584	53.5	164.03	11.7089	40933464	88.0061
36	Friesen Lab	11972000	10408545	8757667	6352194	50.1	147.9	17.7209	38647624	83.0916
37	Friesen Lab	14366990	11888361	10111798	7907085	54.7	158.61	18.7231	41128273	88.425
38	Friesen Lab	5301900	3773350	3712604	2846872	52.9	166.82	7.58948	38343623	82.438
39	Friesen Lab	4181266	2958963	2902509	2081167	48.5	149.02	6.73162	34671003	74.542
40	Friesen Lab	10273140	7864044	7687802	5936229	55.4	152.02	14.1665	40708836	87.5232
41	Friesen Lab	9110920	6435085	6295467	5157025	57.3	157.11	12.3963	41501540	89.2275
42	Friesen Lab	10456986	9197606	7689769	2250392	54.7	132.05	5.98897	32356457	69.5657
43	Friesen Lab	14695846	10604071	10389989	8242820	55.3	167.43	20.0159	41262409	88.7133
45	Friesen Lab	5299568	3698685	3624901	2702298	52.2	165.57	7.25815	37612695	80.8665
46	Friesen Lab	13680942	9777284	9554205	7374512	54.2	169.15	17.5532	42186968	90.7011
47	Friesen Lab	8210322	5965329	5844965	5024629	60.8	150.12	11.3768	41400358	89.0099
48	Friesen Lab	8820432	7608530	6359603	2385825	48.7	133.6	7.36945	32661366	70.2213
49	Friesen Lab	8307990	7130989	5980950	4699696	54.9	139.2	11.7257	41438315	89.0915
50	Friesen Lab	8484590	7105288	5971017	4634397	54.8	151.94	11.3243	39121199	84.1098
51	Friesen Lab	8988350	6276689	6147316	4322451	48.1	172.99	12.2574	39155786	84.1841
52	Friesen Lab	7656044	5365137	5257362	3679875	47	164.75	10.8991	37677623	81.0061
53	Friesen Lab	11496848	9464994	7935824	6420346	57.4	174.91	14.5735	40540128	87.1605
55	Friesen Lab	7635316	5767118	5641490	3993891	48.4	137.84	11.2412	38740823	83.292
56	Friesen Lab	12170694	10292276	8661131	6491330	52.9	151.46	15.4413	40957463	88.0577
57	Friesen Lab	4669136	3345104	3277263	2475954	51.6	137.47	7.18717	34886829	75.006
58	Friesen Lab	9657442	6968782	6823679	5641807	57.3	167.57	13.6744	41118114	88.4031
59	Friesen Lab	15393352	11347428	11078490	9022844	58	167.15	19.9975	40938201	88.0163
60	Friesen Lab	5682758	4086104	4005228	2905329	50.2	160.46	8.13606	38122791	81.9632
61	Friesen Lab	10969884	8450186	8284144	6676656	57.4	150.77	15.2739	43201957	92.8833
62	Friesen Lab	10294472	7908041	7717891	6472511	59.6	141.5	14.4259	41331547	88.862
63	Friesen Lab	3687586	2557846	2502537	1832612	49.6	149.56	5.76462	30850615	66.3282
64	Friesen Lab	11913844	9055726	8782519	6472259	53.3	146.45	15.9464	41124086	88.416
65	Friesen Lab	6404188	4608238	4523514	3544260	55.2	185.65	8.74414	40971749	88.0884
66	Friesen Lab	9104860	6795377	6642785	4933818	51.6	156.77	13.1145	40279710	86.6006
67	Friesen Lab	6901930	5231620	5106598	3923940	53.5	137.19	10.5265	40437993	86.9409
68	Friesen Lab	7410524	5457712	5310399	3779742	47.7	135.13	12.0451	37202948	79.9856
69	Friesen Lab	9595534	7522335	7174608	3814810	58.4	143.88	9.14866	39399495	84.7081
70	Friesen Lab	11141322	8411373	8221704	6225642	53.7	152.52	15.37	40685509	87.473
72	Friesen Lab	13163016	10116256	9897455	7039555	49.6	161.81	18.7562	40098377	86.2107
75	Friesen Lab	7410530	5257884	5124765	3766910	50.8	133.09	10.6788	39363791	84.6314
76	Friesen Lab	6255880	4503102	4388115	3479583	55.2	131.62	8.87357	39003430	83.8566
77	Friesen Lab	7964892	5564727	5467208	4085640	52.1	158.76	10.6026	41317503	88.8318
79b	Friesen Lab	8624868	7394043	6289312	5125047	57.1	144.27	12.1425	41229798	88.6432
81	Friesen Lab	4971250	3604935	3521306	2881080	57.1	136.44	7.27078	36839621	79.2044
82	Friesen Lab	3253074	2246572	2188535	1864177	60.5	129.33	4.54821	25665396	55.1801
83	Friesen Lab	8560860	6237369	6058614	4938854	57.4	140.94	11.7339	41547486	89.3263
84	Friesen Lab	6881982	4968948	4834962	3614435	50.6	135.67	10.6206	38192198	82.1125
85	Friesen Lab	6217620	4471022	4380100	3322576	51.7	152.14	9.04262	39214477	84.3103
86	Friesen Lab	8931060	6478848	6338117	4961622	54.3	160.29	12.825	38901850	83.6382
87	Friesen Lab	10210828	9039474	7679826	5587461	50.6	133.88	14.8073	39973886	85.943
88	Friesen Lab	11960490	10706111	8659826	2177744	59.3	139.23	5.53781	29766326	63.997
90	Friesen Lab	11257842	9872188	8300450	5896650	49.4	136.86	15.9335	40512908	87.1019
91	Friesen Lab	8033660	7095464	6065624	4479252	51.7	130.49	11.8724	39076598	84.0139
92	Friesen Lab	7811808	6522702	5572859	4372667	55	151.26	10.7142	39994053	85.9864
93	Friesen Lab	10651364	9305429	7837104	5587351	49.6	146.02	15.0656	40536817	87.1533
95	Friesen Lab	10369402	9095766	7611389	5713322	53.8	148.88	14.1168	40796722	87.7121
96	Friesen Lab	9669876	8424993	7116847	5432750	53.7	144.98	13.4306	42221972	90.7764
97	Friesen Lab	10318350	9049886	7635093	6039473	55.6	148.57	14.4097	41812701	89.8965
98	Friesen Lab	10248462	8938763	7421415	5756799	55.8	150.55	13.5222	42297586	90.939
100	Friesen Lab	10727012	9331455	7790909	5539049	50.5	151.74	14.6364	41315425	88.8273
101	Friesen Lab	10057060	8710516	7280235	5201157	52.3	150.55	13.3855	41108373	88.3822
102	Friesen Lab	11445132	9883803	8247895	6406821	55.2	154.68	15.1977	41203615	88.5869
103	Friesen Lab	13379414	11660577	9657028	7762177	57.5	154.37	17.6149	40989952	88.1276
104	Friesen Lab	11680192	10118259	8456741	5519288	45.8	150.69	16.0276	40393902	86.8461
105	Friesen Lab	10803644	9402416	7835612	5902836	53.2	148.22	14.7876	40938574	88.0171
106	Friesen Lab	8524148	7416233	6301972	4687107	52.7	136.19	12.2781	41420478	89.0532
107	Friesen Lab	9490330	8281442	7036712	4917964	55.3	147.17	11.9787	39979636	85.9554
108	Friesen Lab	12878466	11184723	9479810	7656022	58.6	143.04	16.9732	42328520	91.0055
109	Friesen Lab	7819200	6634029	5665373	4091621	50	137.96	11.2799	39971518	85.938
110	Friesen Lab	8814574	7553969	6903132	5403058	56.6	131.52	12.2781	38941935	83.7244
111	Friesen Lab	11563546	10091788	8566118	6099771	51.4	142.21	15.6667	40201298	86.432
112	Friesen Lab	10904934	9388818	7899922	6035470	52.7	144.35	15.3541	39423977	84.7608
113	Friesen Lab	9687462	8245723	7552641	5395349	55.4	127.04	12.636	39310317	84.5164
114	Friesen Lab	10265538	8954082	7647508	5592719	51.6	140.3	14.7088	40676343	87.4533
115	Friesen Lab	10067678	8511803	7841375	4317862	58.9	151.82	9.23964	40300005	86.6442
116	Friesen Lab	6461530	5384723	4888463	2869163	51.8	141.21	7.54214	34435515	74.0357
117	Friesen Lab	7076980	5841330	5320502	4453265	57.8	140.61	10.497	40791388	87.7007
118	Friesen Lab	9980056	8305173	7552402	6105550	56.2	134.5	14.2389	40478816	87.0286
119	Friesen Lab	7417948	6219946	5667428	2724143	53.1	135.2	7.33985	35049151	75.355
120	Friesen Lab	10731760	9169852	8378856	6594995	55.5	144.24	14.5262	42299760	90.9436
